# Supplementary material
Source: PubMed Central journal article supplement (PMC5393348)
Supplement: NIHMS857586-supplement.pdf [file NIHMS857586-supplement.pdf]

**Supplemental Information**

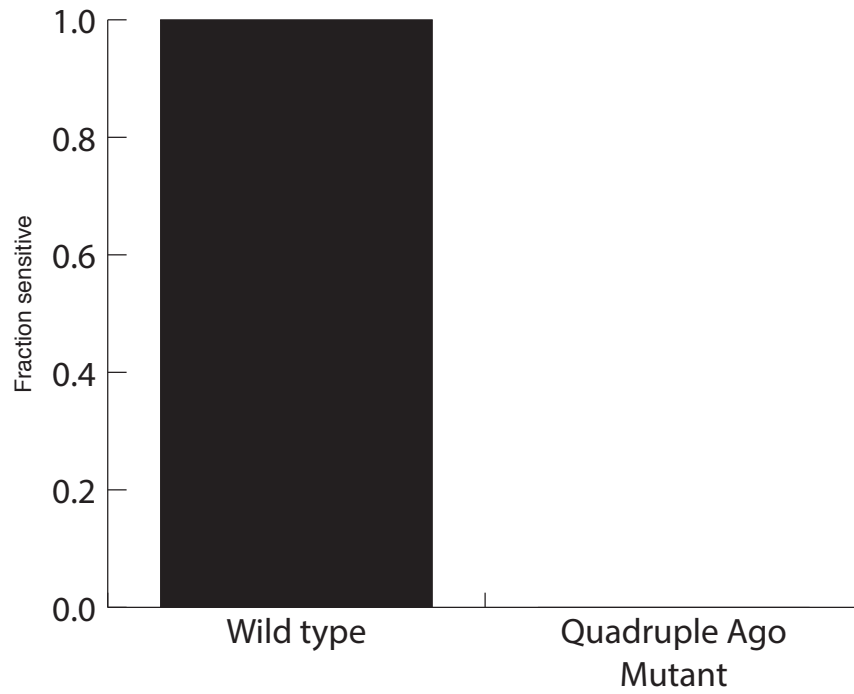

**Figure S1. Cytoplasmic argonautes are required for RNAi, related to Figure 1.** HC1054 [*sago-1(tm1195)*, *sago-2(tm894)*, *ppw-1(tm914)*, *wago-4(tm1019)*] quadruple mutant is resistant to *act-5* feeding RNAi. N=10.

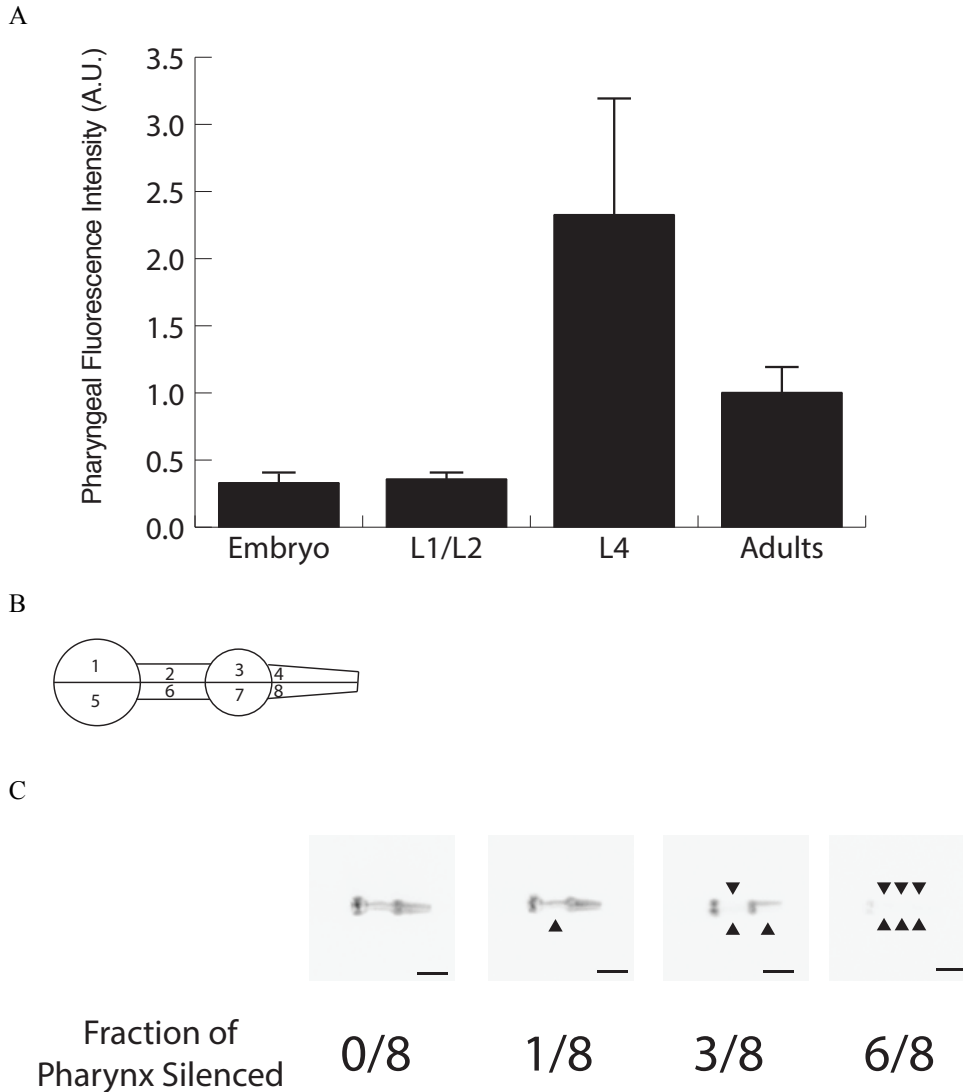

**Figure S2. Heat-shock promoter expression in the pharynx and scoring GFP silencing in the pharynx, Related to Figure 2.** A) The *hsp-16.2* promoter is not more strongly expressed in the pharynx of young worms. Pharyngeal GFP fluorescence intensity 24 hours post heat-shock in *hsp-16.2::GFP* worms at different stages. Error bars represent standard deviation; n=19-22 animals per developmental stage. B) To score pharyngeal silencing, the pharynx was divided into eight sections. C) The number of strongly silenced sections, out of eight, was determined. Arrowheads point to silenced sections. Scoring was done blind to the identity of the worm. Scale bars represent 5  $\mu$ m.

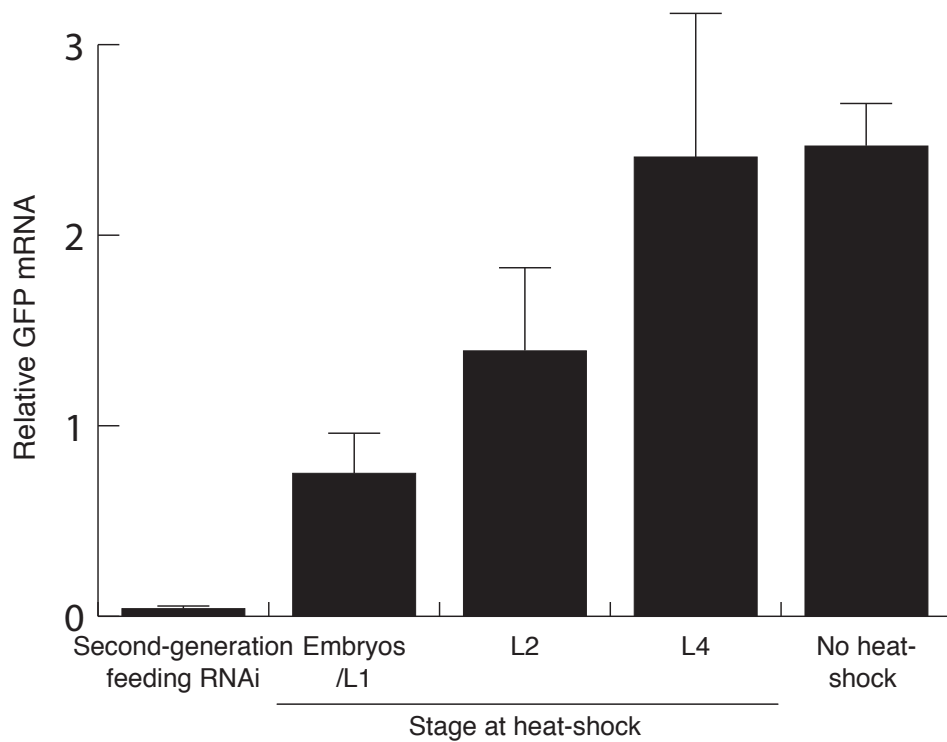

**Figure S3. GFP mRNA is reduced when embryos are induced to express GFP dsRNA, but not when older worms are, Related to Figure 3.** Worms were either fed GFP dsRNA for two generations, or heat-shocked at the indicated times. For feeding RNAi, worms were normalized to animals treated with mock RNAi, while the heat-shock experiments, heat-shocked animals with the *hsp-16.2::GFP* dsRNA array were normalized to worms lacking the array. RNA levels were measured 48 hours after GFP dsRNA induction. N=5-11. Bars represent SEM.

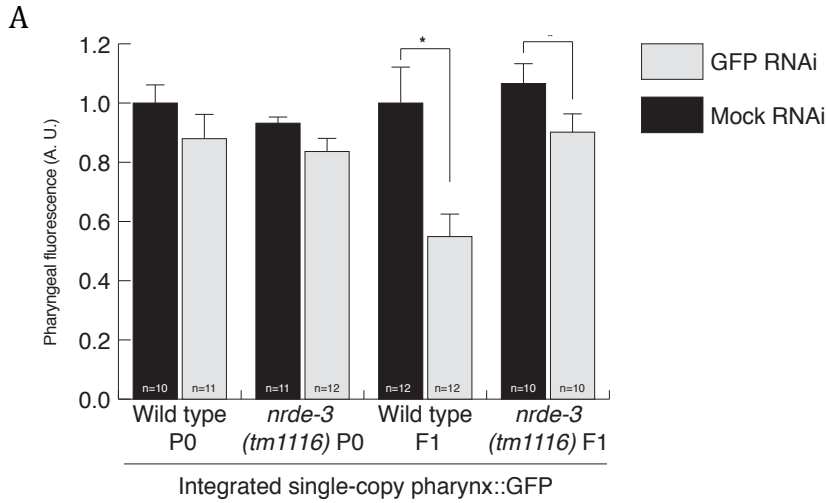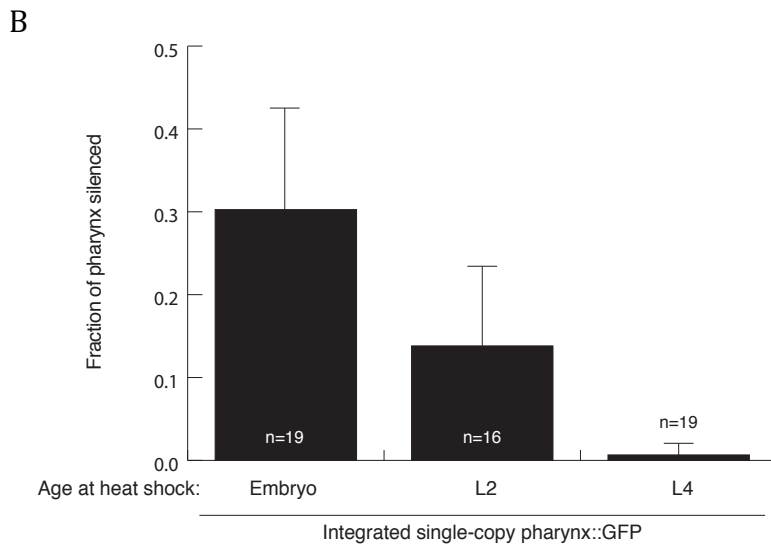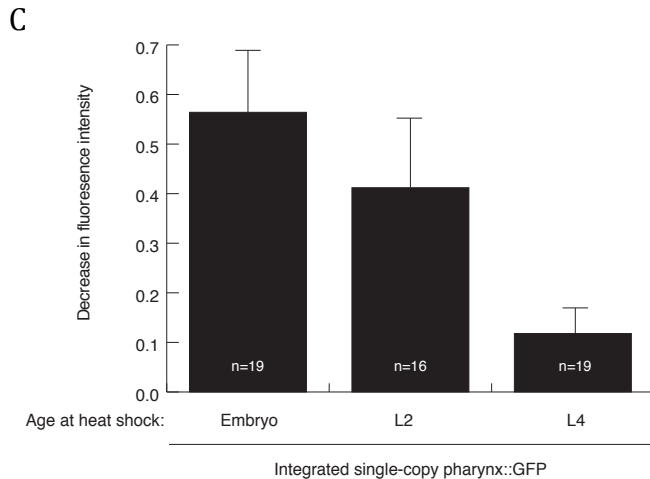

**Figure S4. Silencing of a single-copy *myo-2::GFP* insertion is also *nrde-3* dependent and has a critical period, Related to Figures 1 and 2.** A) Silencing of a single-copy *myo-2::GFP* insertion by feeding RNAi either in the first or second generation, normalized to wild type fluorescence intensity on mock RNAi. B) Fraction of pharyngeal muscle silenced, as scored in figure S2C. C) Decrease in fluorescence intensity, compared to an age-matched, heat-shocked worm lacking the GFP-hairpin. Error bars represent standard deviation, n = animals scored.

| Genotype                           | First-generation RNAi |                     |              | Second-generation RNAi |                     |
|------------------------------------|-----------------------|---------------------|--------------|------------------------|---------------------|
|                                    | <i>pha-4</i> RNAi     | pharyngeal GFP RNAi | BWM GFP RNAi | <i>pha-4</i> RNAi      | pharyngeal GFP RNAi |
| N2                                 | -                     | -                   | +            | ++                     | +                   |
| <i>sid-1</i>                       | -                     | -                   | -            | -                      | -                   |
| <i>rde-1</i>                       | -                     | -                   | -            | -                      | -                   |
| <i>rrf-1</i>                       | -                     | -                   | NT           | ++                     | -                   |
| <i>rde-12</i>                      | -                     | -                   | +/-          | -                      | -                   |
| MAGO (four cytoplasmic argonautes) | -                     | -                   | +            | -                      | +                   |
| <i>hrde-1</i>                      | -                     | NT                  | NT           | ++                     | NT                  |
| <i>nrde-2</i>                      | -                     | NT                  | NT           | -                      | NT                  |
| <i>nrde-3</i>                      | -                     | -                   | + *          | -                      | -                   |
| <i>rrf-3</i>                       | +/-                   | NT                  | NT           | ++                     | NT                  |
| <i>eri-1</i>                       | -                     | +/-                 | NT           | ++                     | +                   |
| <i>lin-15ab</i>                    | +                     | +                   | NT           | ++                     | +                   |
| <i>lin-35</i>                      | +                     | NT                  | NT           | ++                     | NT                  |
| <i>lin-35, nrde-2</i>              | -                     | NT                  | NT           | -                      | NT                  |
| Maternal <i>sid-1(-)</i>           | NA                    | NA                  | NA           | NT                     | -                   |

**Table S1. Summary of sensitivity of various RNAi mutants to feeding RNAi, Related to Figure 5.**

Embryos were placed on *E. coli* expressing either *pha-4* or *GFP* dsRNA. For *pha-4* RNAi, worms were scored as ++ if arrested prior to L2, + if arrested prior to L4, and +/- if only a fraction of worms arrested prior to L4. See Figures 1 and 5. For body-wall muscle RNAi, +/- represents that worms were only partially silenced. +\* represents that vulval muscle were not silenced, see Figure 4. For maternal *sid-1* tests, *sid-1(qt78)* young adult hermaphrodites were fed GFP dsRNA expressing bacteria and crossed to male wild-type worms with the *myo-2::GFP* array. The cross progeny were reared on OP50 and scored for silencing. NT: Not tested. NA: Not applicable.

| RNA Abundance (FKPM)                 |           |                  |                   |
|--------------------------------------|-----------|------------------|-------------------|
|                                      | Intestine | Body-wall Muscle | Pharyngeal Muscle |
| <b>Cytoplasmic Argonautes</b>        |           |                  |                   |
| <i>C04F12.1/vrsa-1</i>               | 0.94      | 0.23             | 0.06              |
| <i>wago-4</i>                        | 0.09      | 1.86             | 0.16              |
| <i>ppw-1</i>                         | 3.33      | 3.15             | <b>0</b>          |
| <i>ppw-2</i>                         | 0.27      | 0.99             | 0.11              |
| <i>sago-1</i>                        | 6.83      | 0.36             | <b>0</b>          |
| <i>sago-2</i>                        | 1.8       | 0.26             | <b>0</b>          |
| <b>Systemic RNAi genes</b>           |           |                  |                   |
| <i>sid-1</i>                         | 2.09      | 0.82             | 0.96              |
| <i>sid-2</i>                         | 3.96      | 0                | 0                 |
| <b>Primary siRNA processing</b>      |           |                  |                   |
| <i>dcr-1</i>                         | 0.81      | 0.82             | 0.55              |
| <i>rde-1</i>                         | 1.9       | 0.94             | 0.39              |
| <b>Secondary siRNA amplification</b> |           |                  |                   |
| <i>rde-10</i>                        | 0.57      | 0.62             | 0.54              |
| <i>rde-11</i>                        | 1.77      | 0.94             | 0.31              |
| <i>rde-12</i>                        | 1.72      | 1.47             | 0.94              |
| <i>rrf-1</i>                         | 1.15      | 0.52             | 0.14              |
| <b>Nuclear RNAi pathway</b>          |           |                  |                   |
| <i>nrde-1</i>                        | 1.08      | 0.35             | 0.43              |
| <i>nrde-2</i>                        | 1.77      | 1.39             | 0.88              |
| <i>nrde-3</i>                        | 1.52      | 0.26             | 0.37              |
| <i>nrde-4</i>                        | 2.79      | 0.52             | 0.86              |

**Table S2.** RNA abundance levels of various RNAi-related genes, in FKPM, in the intestine, body-wall muscle and pharynx, Related to Figure 1. Data is from Blazie et al., 2015.

## Supplemental Experimental Procedures

### Strains used in this study

| Strain name | Genotype                                                                                                                                                                         | Reference             |
|-------------|----------------------------------------------------------------------------------------------------------------------------------------------------------------------------------|-----------------------|
| N2 Bristol  | Wild type                                                                                                                                                                        | Brenner, 1974         |
| HC57        | <i>mIs3[Pmyo2:: gfp-hp RNA]; mIs11[myo-2p::GFP + pes-10p::GFP + gut-promoter::GFP]; ccls4251[(pSAK2) myo-3p::GFP::LacZ::NLS + (pSAK4) myo-3p::mitochondrial GFP + dpy-20(+)]</i> | Winston et al., 2002  |
| HC1050      | <i>mIs11, ccls4251</i>                                                                                                                                                           | This study            |
| HC1051      | <i>rde-1 (ne219); mIs11; ccls4251</i>                                                                                                                                            | This study            |
| HC1052      | <i>rde-12(qt131); mIs11; ccls4251</i>                                                                                                                                            | This study            |
| HC1053      | <i>nrde-3 (tm1116); mIs11; ccls4251</i>                                                                                                                                          | This study            |
| HC1054      | <i>sago-1 (tm1195); sago-2 (tm894); ppw-1(tm914); wago-4(tm1019); mIs11; ccls4251,</i>                                                                                           | This study            |
| HC1077      | <i>rde-1 (ne219); mIs11;</i>                                                                                                                                                     | This study            |
| HC1078      | <i>rde-12 (qt131); mIs11;</i>                                                                                                                                                    | This study            |
| HC1079      | <i>nrde-3 (tm1116); mIs11;</i>                                                                                                                                                   | This study            |
| HC1095      | <i>sago-1 (tm1195); sago-2 (tm894); ppw-1(tm914); wago-4(tm1019); mIs11;</i>                                                                                                     | This study            |
| HC1055      | <i>qtEx197[hsp-16.2::GFP dsRNA, myo-3::mCherry, NeoR]; mIs11</i>                                                                                                                 | This study            |
| HC1056      | <i>qtEx198[hsp-16.2::GFP dsRNA, myo-3::mCherry, NeoR]; mIs11, nrde-3(tm1116)</i>                                                                                                 | This study            |
| HC1057      | <i>qtEx198, mIs11</i>                                                                                                                                                            | This study            |
| PD4443      | <i>ccls4443 [arg-1::GFP + dpy-20(+)]</i>                                                                                                                                         | Kostas and Fire, 2002 |
| HC1082      | <i>ccls4443; nrde-3(tm1116)</i>                                                                                                                                                  | This study            |
| HC1065      | <i>eri-1 (mg366); qtEx197; mIs11</i>                                                                                                                                             | This study            |
| HC1066      | <i>lin-15ab (n765), qtEx197, mIs11</i>                                                                                                                                           | This study            |
| HC1062      | <i>eri-1 (mg366), mIs11, ccls4251</i>                                                                                                                                            | This study            |
| HC1063      | <i>lin-15ab (n765) mIs11, ccls4251,</i>                                                                                                                                          | This study            |
| GR1373      | <i>eri-1 (mg366)</i>                                                                                                                                                             | Kennedy et al., 2004  |
| MT8189      | <i>lin-15ab (n765)</i>                                                                                                                                                           | Wang et al., 2005     |
| MT10430     | <i>lin-35 (n745)</i>                                                                                                                                                             | Lu and Horvitz, 1998  |
| HC1068      | <i>lin-35 (n745), nrde-2 (gg91)</i>                                                                                                                                              | This study            |
| NL2099      | <i>rrf-3(pk1426)</i>                                                                                                                                                             | Simmer et al., 2002   |
| TJ375       | <i>gpIs1[hsp-16.2p::GFP]</i>                                                                                                                                                     | Rea et al., 2005      |
| HC1073      | <i>f32b4.4(-), myo-2p::GFP</i>                                                                                                                                                   | This study            |
| HC1094      | <i>f32b4.4(-), myo-2p::GFP, nrde-3 (tm1116)</i>                                                                                                                                  | This study            |
| WM27        | <i>rde-1 (ne219)</i>                                                                                                                                                             | Tabara et al., 1999   |
| HC445       | <i>sid-1(qt9)</i>                                                                                                                                                                | Winston et al., 2002  |
| NL2098      | <i>rrf-1(pk1417)</i>                                                                                                                                                             | Sijen et al., 2001    |
| HC820       | <i>rde-12(qt131)</i>                                                                                                                                                             | Yang et al., 2014     |
| FX1200      | <i>hrde-1(tm1200)</i>                                                                                                                                                            | Buckley et al., 2012  |
| YY186       | <i>nrde-2(gg91)</i>                                                                                                                                                              | Guang et al., 2010    |
| WM156       | <i>nrde-3(tm1116)</i>                                                                                                                                                            | Gu et al., 2009       |

**qPCR.** RNA, collected as in Ly et al., 2005, was treated with Dnase I (Roche) (30° C 20 minutes), heat inactivated (75° C for 10 minutes) and reverse transcribed using random hexamers and Thermoscript RT (Invitrogen). 2 uL of the resulting cDNA (diluted 1:10 in water) was used in a 25 uL QuantiTect SYBR Green (Qiagen) reaction. qPCR was performed using an Eppendorf Mastercycler Realplex4 and Noiseband quantification with the following PCR cycle: 15 minutes 95° C, 15 seconds 94° C, 30 seconds 56° C, 35 seconds 72° C, read, cycle to step 2 for 40 cycles. Analysis was performed using the  $\Delta\Delta CT$  method. Primers specific to GFP mRNA, and not the GFP-hairpin were used. GFP mRNA levels was normalized to *act-1* mRNA levels. To calculate the decrease in GFP, heat-shocked worms were normalized to heat-shocked worms lacking the array.

**DNA constructs.** We used pCFJ104 to express mCherry in the body-wall muscle and pCFJ910 to express NeoR, which confers G418 resistance to worms (Frokjaer-Jensen et al., 2014).

To create the hsp-16.2p::GFP-hairpin plasmid pHC236, the GFP hairpin was cut out of pPD126.25 using NotI and AgeI. This fragment was inserted into pPD118.26, which had been digested with NotI and BspEI.

**Primers:**

act-1 qPCR F : ACGCCAACACTGTTCTTTCC

act-1 qPCR R: GATGATCTTGATCTTCATGGTTGA

Myo-2 GFP qPCR F: AGCTCCCGAGATCCTATCG

Myo-2 GFP qPCR R: ATTGGGACAACTCCAGTGAAA



## Supplemental References

1. Blazie SM, Babb C, Wilky H, Rawls A, Park JG, Mangone M. Comparative RNA-Seq analysis reveals pervasive tissue-specific alternative polyadenylation in *Caenorhabditis elegans* intestine and muscles. *BMC Biol* 2015;13.
2. Brenner, S. (1974). The genetics of *Caenorhabditis elegans*. *Genetics* 77, 71-94.
3. Buckley B a., Burkhart KB, Gu SG, Spracklin G, Kershner A, Fritz H, et al. A nuclear Argonaute promotes multigenerational epigenetic inheritance and germline immortality. *Nature* 2012;489:447–51. doi:10.1038/nature11352.
4. Frokjaer-Jensen C, Davis MW, Sarov M, Taylor J, Flibotte S, LaBella M, et al. Random and targeted transgene insertion in *C. elegans* using a modified Mos1 transposon. *Nat Methods* 2014;11:529–34. doi:10.1038/nmeth.2889.
5. Gu W, Shirayama M, Conte D, Vasale J, Batista PJ, Claycomb JM, et al. Distinct Argonaute-Mediated 22G-RNA Pathways Direct Genome Surveillance in the *C. elegans* Germline. *Mol Cell* 2009;36:231–44. doi:10.1016/j.molcel.2009.09.020.
6. Guang S, Bochner AF, Burkhart KB, Burton N, Pavelec DM, Kennedy S. Small regulatory RNAs inhibit RNA polymerase II during the elongation phase of transcription. *Nature* 2010;465:1097–101. doi:10.1038/nature09095.
7. Kennedy S., Wang D., Ruvkun G. A conserved siRNA-degrading RNase negatively regulates RNA interference in *C. elegans*. *Nature* 2004 427: 645–649.
8. Kostas SA, Fire A. The T-box factor MLS-1 acts as a molecular switch during specification of nonstriated muscle in *C. elegans*. *Genes Dev* 2002;16:257–69. doi:10.1101/gad.923102.
9. Lu X, Horvitz HR. Lin-35 and lin-53, two genes that antagonize a *C. elegans* Ras pathway, encode proteins similar to Rb and its binding protein RbAp48. *Cell* 1998;95:981–91. doi:10.1016/S0092-8674(00)81722-5.
10. Ly, K., Reid, S. J., & Snell, R. G. (2015). Rapid RNA analysis of individual *Caenorhabditis elegans*. *MethodsX*, 2, 59–63.
11. Rea SL, Wu D, Cypser JR, Vaupel JW, Johnson TE. A stress-sensitive reporter predicts longevity in isogenic populations of *Caenorhabditis elegans*. *Nat Genet* 2005;37:894–8. doi:10.1038/ng1608.
12. Sijen T, Fleenor J, Simmer F, Thijssen KL, Parrish S, et al. On the role of RNA amplification in dsRNA-triggered gene silencing. *Cell*. 2001;107:465–476.
13. Simmer F, Tijsterman M, Parrish S, Koushika SP, Nonet ML, Fire A, et al. Loss of the putative RNA-directed RNA polymerase RRF-3 makes *C. elegans* hypersensitive to

RNAi. *Curr Biol* 2002;12:1317–9. doi:10.1016/S0960-9822(02)01041-2.

14. Tabara H, Sarkissian M, Kelly WG, Fleenor J, Grishok A, Timmons L, et al. The *rde-1* gene, RNA interference, and transposon silencing in *C. elegans*. *Cell* 1999;99:123–32. doi:10.1016/S0092-8674(00)81644-X.

15. Wang D, Kennedy S, Conte D, Kim JK, Gabel HW, Kamath RS, et al. Somatic misexpression of germline P granules and enhanced RNA interference in retinoblastoma pathway mutants. *Nature* 2005;436:593–7. doi:10.1038/nature04010.

16. Winston WM, Molodowitch C, Hunter CP. Systemic RNAi in *C. elegans* requires the putative transmembrane protein SID-1. *Science* (80- ) 2002;295:2456–9. doi:10.1126/science.1068836 1068836.

17. Yang H, Vallandingham J, Shiu P, Li H, Hunter CP, Mak HY. The DEAD box helicase RDE-12 promotes amplification of RNAi in cytoplasmic foci in *C. Elegans*. *Curr Biol* 2014;24:832–8
